# Supplementary material
Source: ML conference proceedings conference paper supplement (https://proceedings.neurips.cc/paper_files/paper/2012/hash/310dcbbf4cce62f762a2aaa148d556bd-Abstract.html)
Supplement: Supplementary file [file 310dcbbf4cce62f762a2aaa148d556bd-Supplemental.zip]

# Learning about Canonical Views from Internet Image Collections

## Supplemental Material

Elad Mezzuman

Interdisciplinary Center for Neural Computation  
Edmond & Lily Safra Center for Brain Sciences  
Hebrew University of Jerusalem

Yair Weiss

School of Computer Science and Engineering  
Edmond & Lily Safra Center for Brain Sciences  
Hebrew University of Jerusalem

In the supplemental material we present the results of our experiments. We present the output of the automatic phase before it was human validation phase, i.e. we present the modes in the GIST space; for some of the categories it might not correspond to a mode in the view space, thus it would have been rejected in the human validation step.

1. Section 1 contains comparison of our results on the categories for which Palmer *et al.* [1] found the canonical view, using human subjects (“Palmer’s categories”) for three different Internet image search engines - Yahoo, Google and ImageNet [2].
2. Section 2 contains results for “Palmer’s categories” where we used cropped images from ImageNet [2]; the images were cropped using the bounding boxes ImageNet supplies for several categories. The first two modes found by our method are presented.
3. Section 3 contains results for categories inspired by the seminal work of Rosch *et al.* [3] (“Rosch’s categories”), where they studied human recognition for categories in different level of abstraction where the source of images was ImageNet. Two first modes are presented.
4. Section 4 contains selected results for categories of mammals from ImageNet; the images were cropped first according to the bounding boxes ImageNet supplies.
5. Section 5 contains results for a subset of “Palmer’s categories” for which we have downloaded images from two Google “local” sites (google.de and google.es) using the translated name of the object to the local language (German and Spanish).
6. Section 6 contains the control experiment for white background

## 1 “Palmer’s categories”, Yahoo vs. Google vs. ImageNet

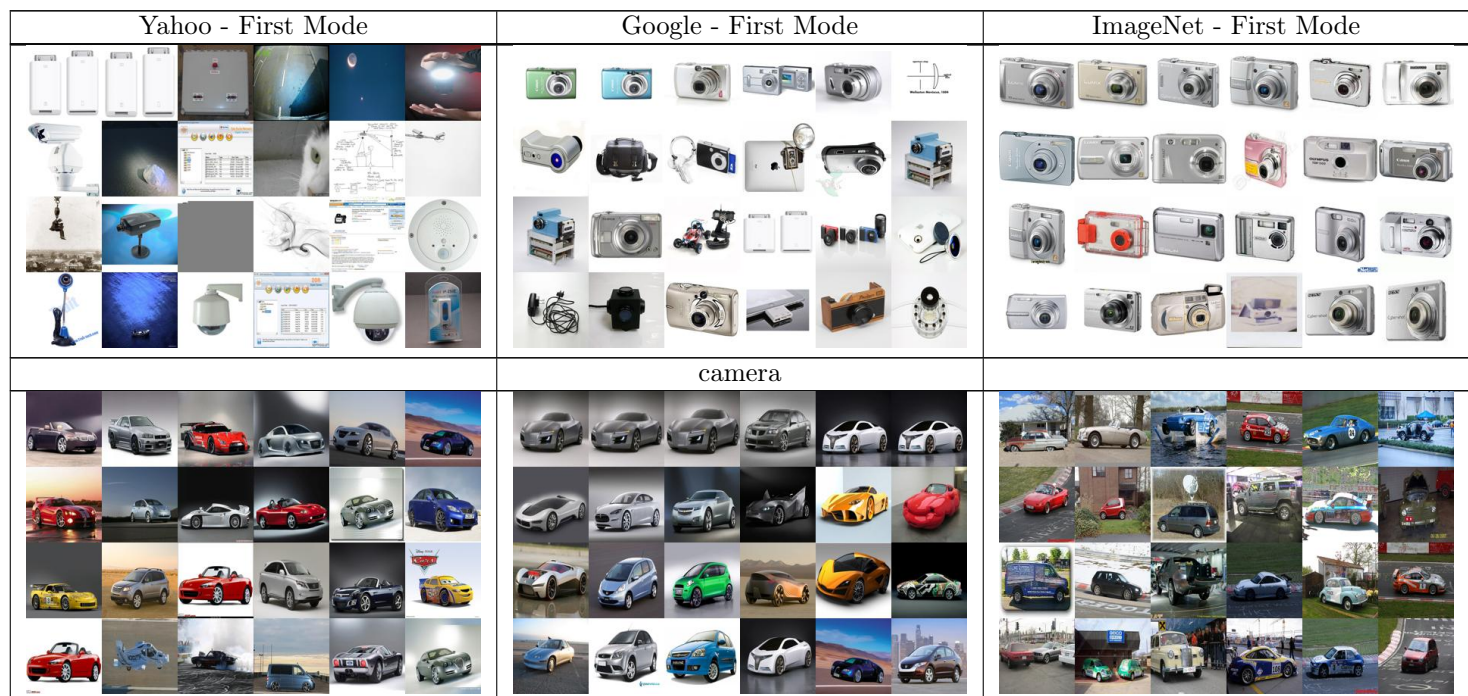



| Yahoo - First Mode                                                                 | Google - First Mode                                                                  | ImageNet - First Mode                                                                 |
|------------------------------------------------------------------------------------|--------------------------------------------------------------------------------------|---------------------------------------------------------------------------------------|
| car                                                                                |                                                                                      |                                                                                       |
| 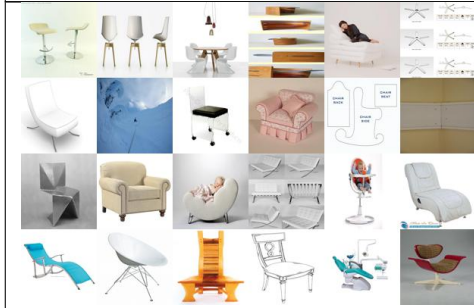   |    |    |
| chair                                                                              |                                                                                      |                                                                                       |
|    |    |    |
| clock                                                                              |                                                                                      |                                                                                       |
|   |   |   |
| horse                                                                              |                                                                                      |                                                                                       |
|  |  |  |
| house                                                                              |                                                                                      |                                                                                       |
|  |  |  |
| steaming iron                                                                      |                                                                                      |                                                                                       |
|  |  |  |



| Yahoo - First Mode                                                                  | Google - First Mode                                                                  | ImageNet - First Mode                                                                 |
|-------------------------------------------------------------------------------------|--------------------------------------------------------------------------------------|---------------------------------------------------------------------------------------|
|    |    |    |
|                                                                                     | manual pencil sharpener                                                              |                                                                                       |
|    |    |    |
|                                                                                     | piano                                                                                |                                                                                       |
|   |   |   |
|                                                                                     | shoe                                                                                 |                                                                                       |
|  |  |  |
|                                                                                     | teapot                                                                               |                                                                                       |
|  |  |  |
|                                                                                     | rotary telephone                                                                     |                                                                                       |



## 2 “Palmer’s categories”, cropped images from ImageNet, two first modes

| Random Set                                                                          | First Mode                                                                           | Second Mode                                                                           |
|-------------------------------------------------------------------------------------|--------------------------------------------------------------------------------------|---------------------------------------------------------------------------------------|
|    |    |    |
|                                                                                     | camera                                                                               |                                                                                       |
|    |    |    |
|                                                                                     | car                                                                                  |                                                                                       |
|   |   |   |
|                                                                                     | chair                                                                                |                                                                                       |
|  |  |  |
|                                                                                     | clock                                                                                |                                                                                       |
|  |  |  |
|                                                                                     | horse                                                                                |                                                                                       |
|  |  |  |
|                                                                                     | house                                                                                |                                                                                       |



| Random Set                                                                         | First Mode                                                                           | Second Mode                                                                           |
|------------------------------------------------------------------------------------|--------------------------------------------------------------------------------------|---------------------------------------------------------------------------------------|
|    |    |    |
|                                                                                    | steaming iron                                                                        |                                                                                       |
|    |    |    |
|                                                                                    | manual pencil sharpener                                                              |                                                                                       |
|    |    |    |
|                                                                                    | piano                                                                                |                                                                                       |
|   |   |   |
|                                                                                    | shoe                                                                                 |                                                                                       |
|  |  |  |
|                                                                                    | teapot                                                                               |                                                                                       |
|  |  |  |
|                                                                                    | rotary telephone                                                                     |                                                                                       |



### 3 “Rosch’s categories”, source: ImageNet (full images)

| Random Set                                                                          | First Mode                                                                           |
|-------------------------------------------------------------------------------------|--------------------------------------------------------------------------------------|
|    |    |
| apple                                                                               |                                                                                      |
|    |    |
| athletic sock                                                                       |                                                                                      |
|   |   |
| ball-peen hammer                                                                    |                                                                                      |
|  |  |
| bongo                                                                               |                                                                                      |
|  |  |
| carpenter's hammer                                                                  |                                                                                      |



| Random Set                                                                          | First Mode                                                                           |
|-------------------------------------------------------------------------------------|--------------------------------------------------------------------------------------|
| 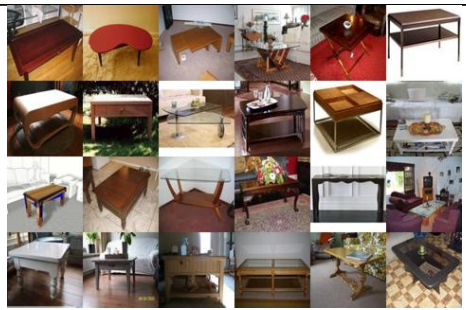   |    |
| coffee table                                                                        |                                                                                      |
|    |    |
| concert grand                                                                       |                                                                                      |
|   |   |
| Concord grape                                                                       |                                                                                      |
|  |  |
| crosscut saw                                                                        |                                                                                      |
|  |  |
| damson                                                                              |                                                                                      |



| Random Set                                                                          | First Mode                                                                           |
|-------------------------------------------------------------------------------------|--------------------------------------------------------------------------------------|
|    |    |
| Delicious                                                                           |                                                                                      |
|    |    |
| dress shirt                                                                         |                                                                                      |
|   |   |
| drum                                                                                |                                                                                      |
|  |  |
| eating apple                                                                        |                                                                                      |
|  |  |
| flat tip screwdriver                                                                |                                                                                      |



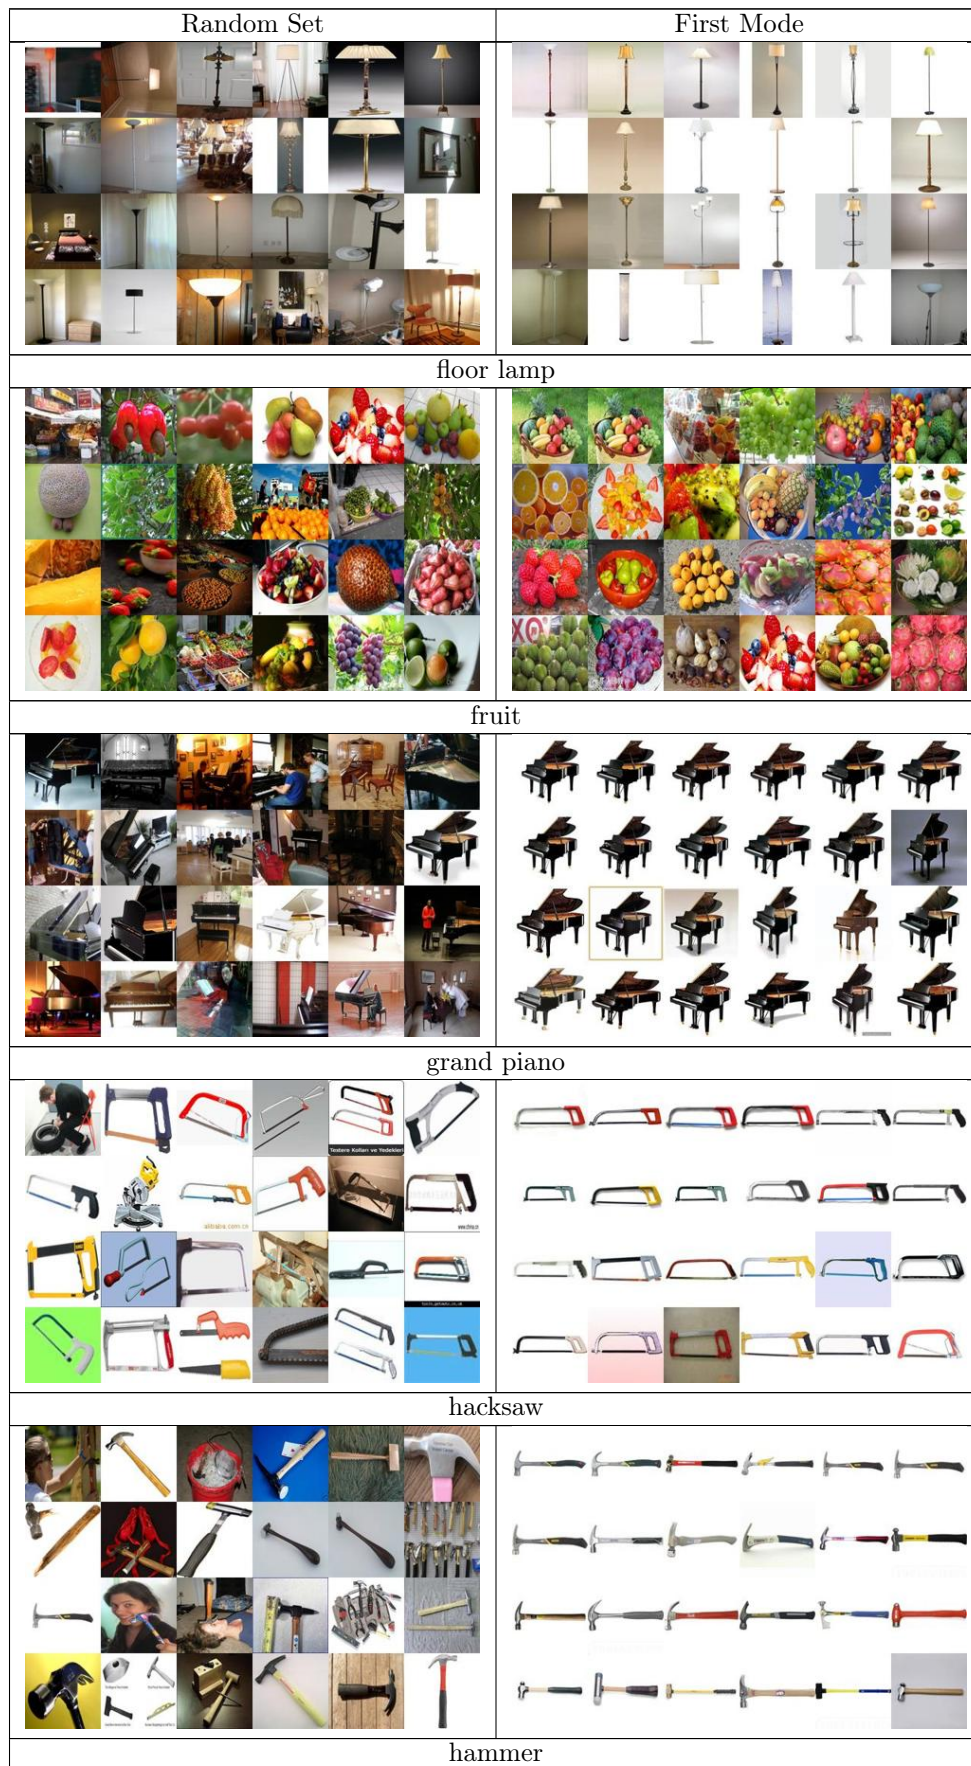



| Random Set                                                                          | First Mode                                                                           |
|-------------------------------------------------------------------------------------|--------------------------------------------------------------------------------------|
| 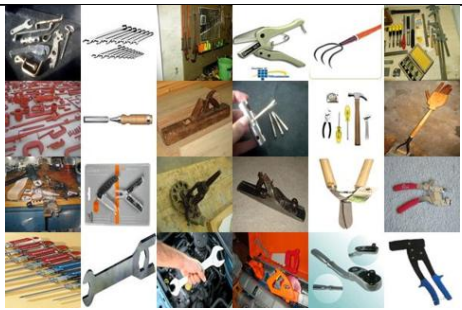   |    |
| hand tool                                                                           |                                                                                      |
|    |    |
| knee-high                                                                           |                                                                                      |
|   |   |
| ladder-back                                                                         |                                                                                      |
|  |  |
| lamp                                                                                |                                                                                      |
|  |  |
| maple                                                                               |                                                                                      |



| Random Set                                                                          | First Mode                                                                           |
|-------------------------------------------------------------------------------------|--------------------------------------------------------------------------------------|
|    |    |
| McIntosh                                                                            |                                                                                      |
|    |    |
| motor vehicle                                                                       |                                                                                      |
|   |   |
| Phillips screwdriver                                                                |                                                                                      |
|  |  |
| pickup                                                                              |                                                                                      |
|  |  |
| polo shirt                                                                          |                                                                                      |



| Random Set                                                                          | First Mode                                                                           |
|-------------------------------------------------------------------------------------|--------------------------------------------------------------------------------------|
|    |    |
| Red Delicious                                                                       |                                                                                      |
|    |    |
| saw                                                                                 |                                                                                      |
|   |   |
| screwdriver                                                                         |                                                                                      |
|  |  |
| sedan                                                                               |                                                                                      |
|  |  |
| shirt                                                                               |                                                                                      |



| Random Set                                                                          | First Mode                                                                           |
|-------------------------------------------------------------------------------------|--------------------------------------------------------------------------------------|
|    |    |
| silver maple                                                                        |                                                                                      |
|    |    |
| slacks                                                                              |                                                                                      |
|   |   |
| snare drum                                                                          |                                                                                      |
|  |  |
| sock                                                                                |                                                                                      |
|  |  |
| sugar maple                                                                         |                                                                                      |



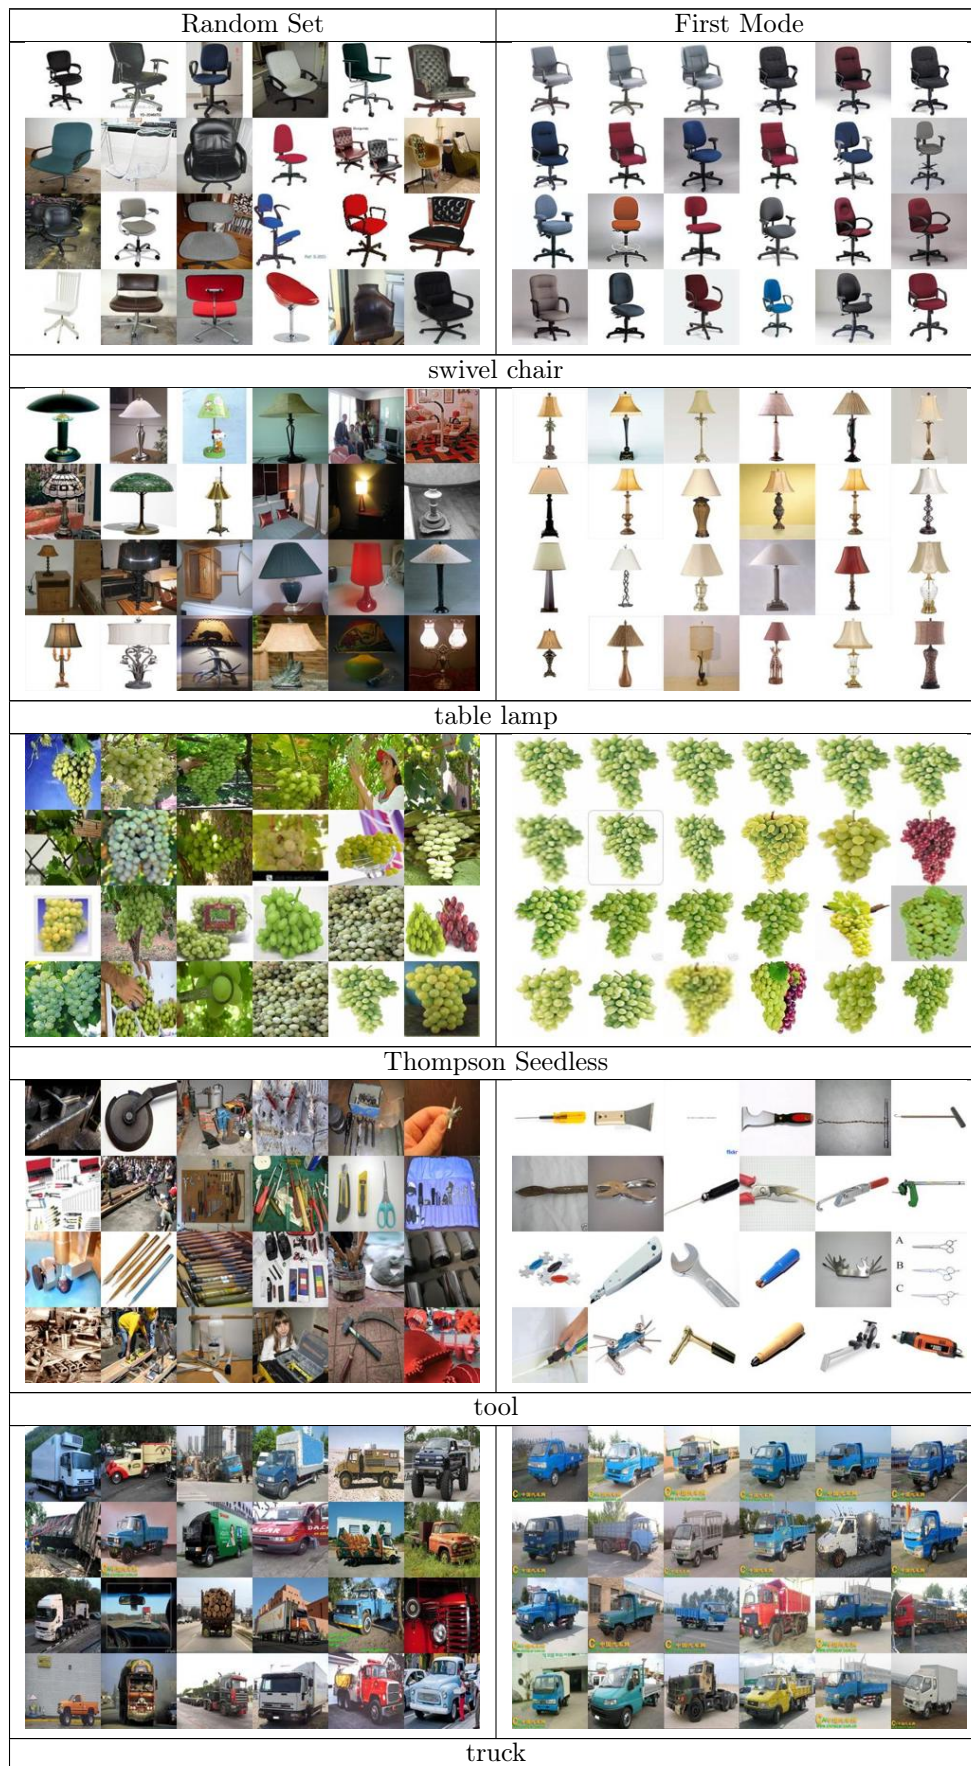



| Random Set                                                                        | First Mode                                                                         |
|-----------------------------------------------------------------------------------|------------------------------------------------------------------------------------|
|  |  |
| upright                                                                           |                                                                                    |
|  |  |
| Victoria plum                                                                     |                                                                                    |



## 4 Mammals, selected categories, source: ImageNet (cropped images)

| Random Set                                                                         | First Mode                                                                           | Second Mode                                                                           |
|------------------------------------------------------------------------------------|--------------------------------------------------------------------------------------|---------------------------------------------------------------------------------------|
|    |    |    |
| affenpinscher                                                                      |                                                                                      |                                                                                       |
|    |    |    |
| African elephant                                                                   |                                                                                      |                                                                                       |
|   |   |   |
| Australian terrier                                                                 |                                                                                      |                                                                                       |
|  |  |  |
| bison                                                                              |                                                                                      |                                                                                       |
|  |  |  |
| black-and-tan coonhound                                                            |                                                                                      |                                                                                       |



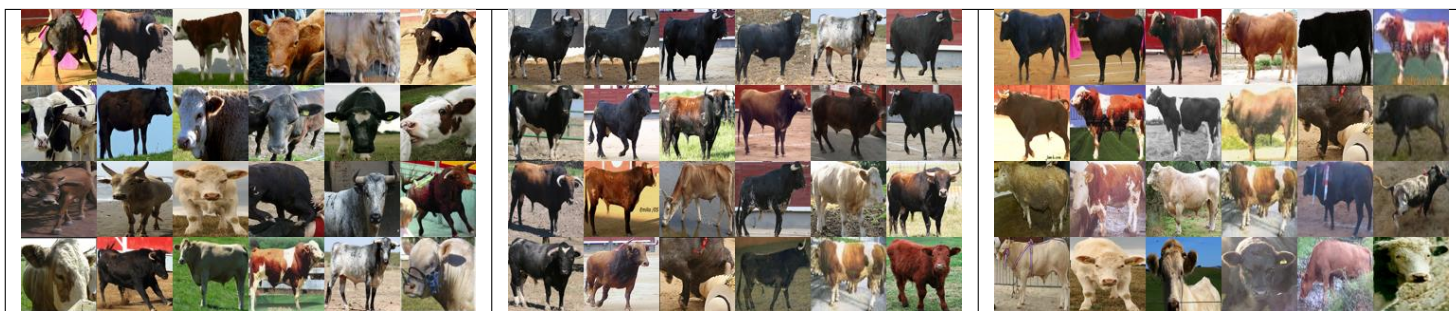

bullock

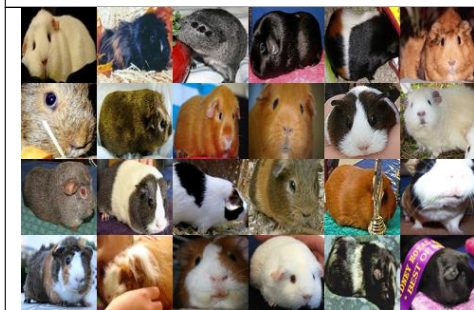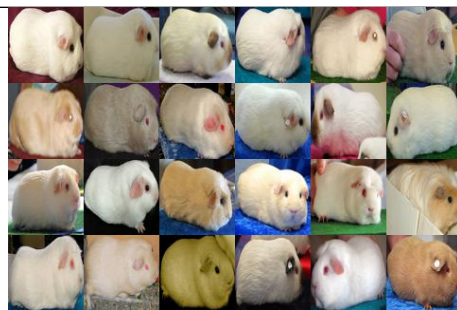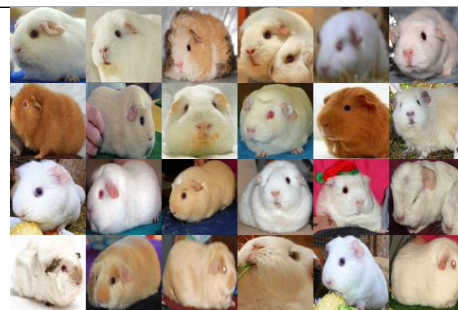

cavy

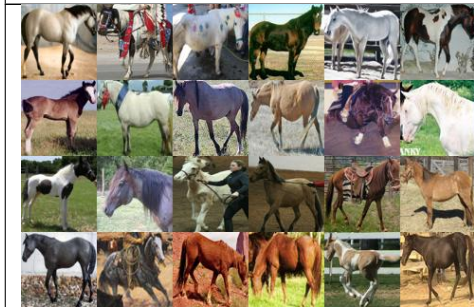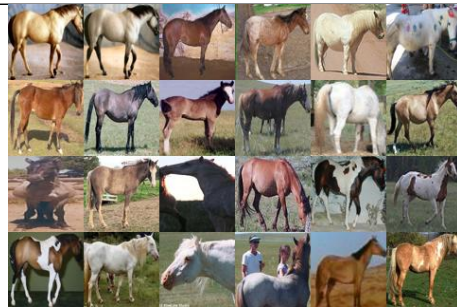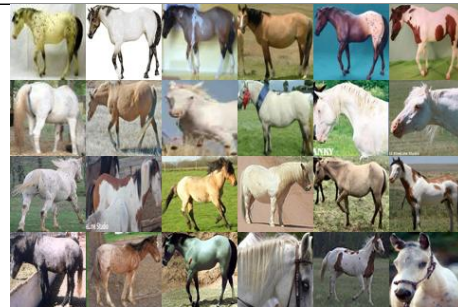

cayuse

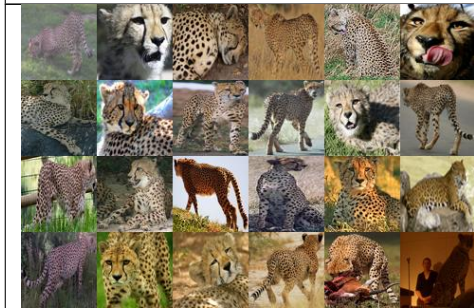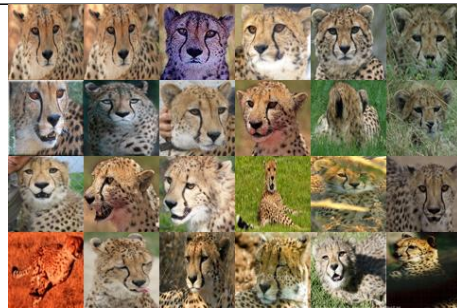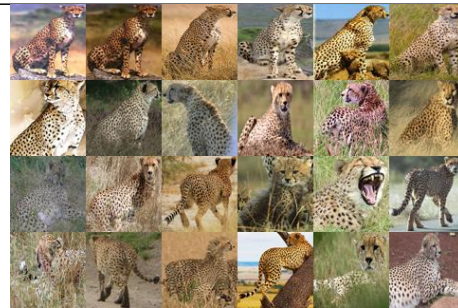

cheetah

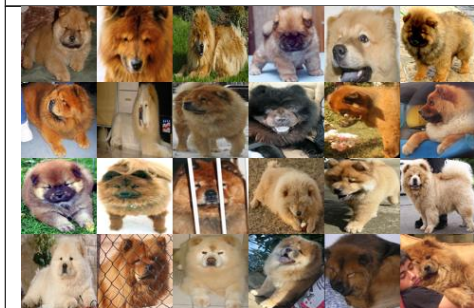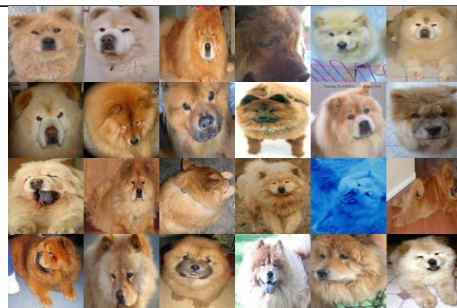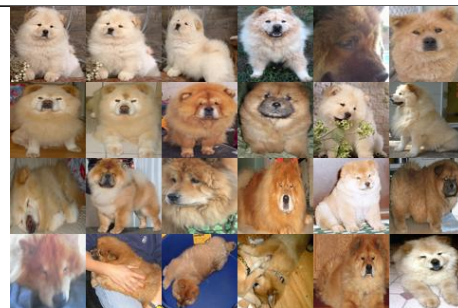

chow



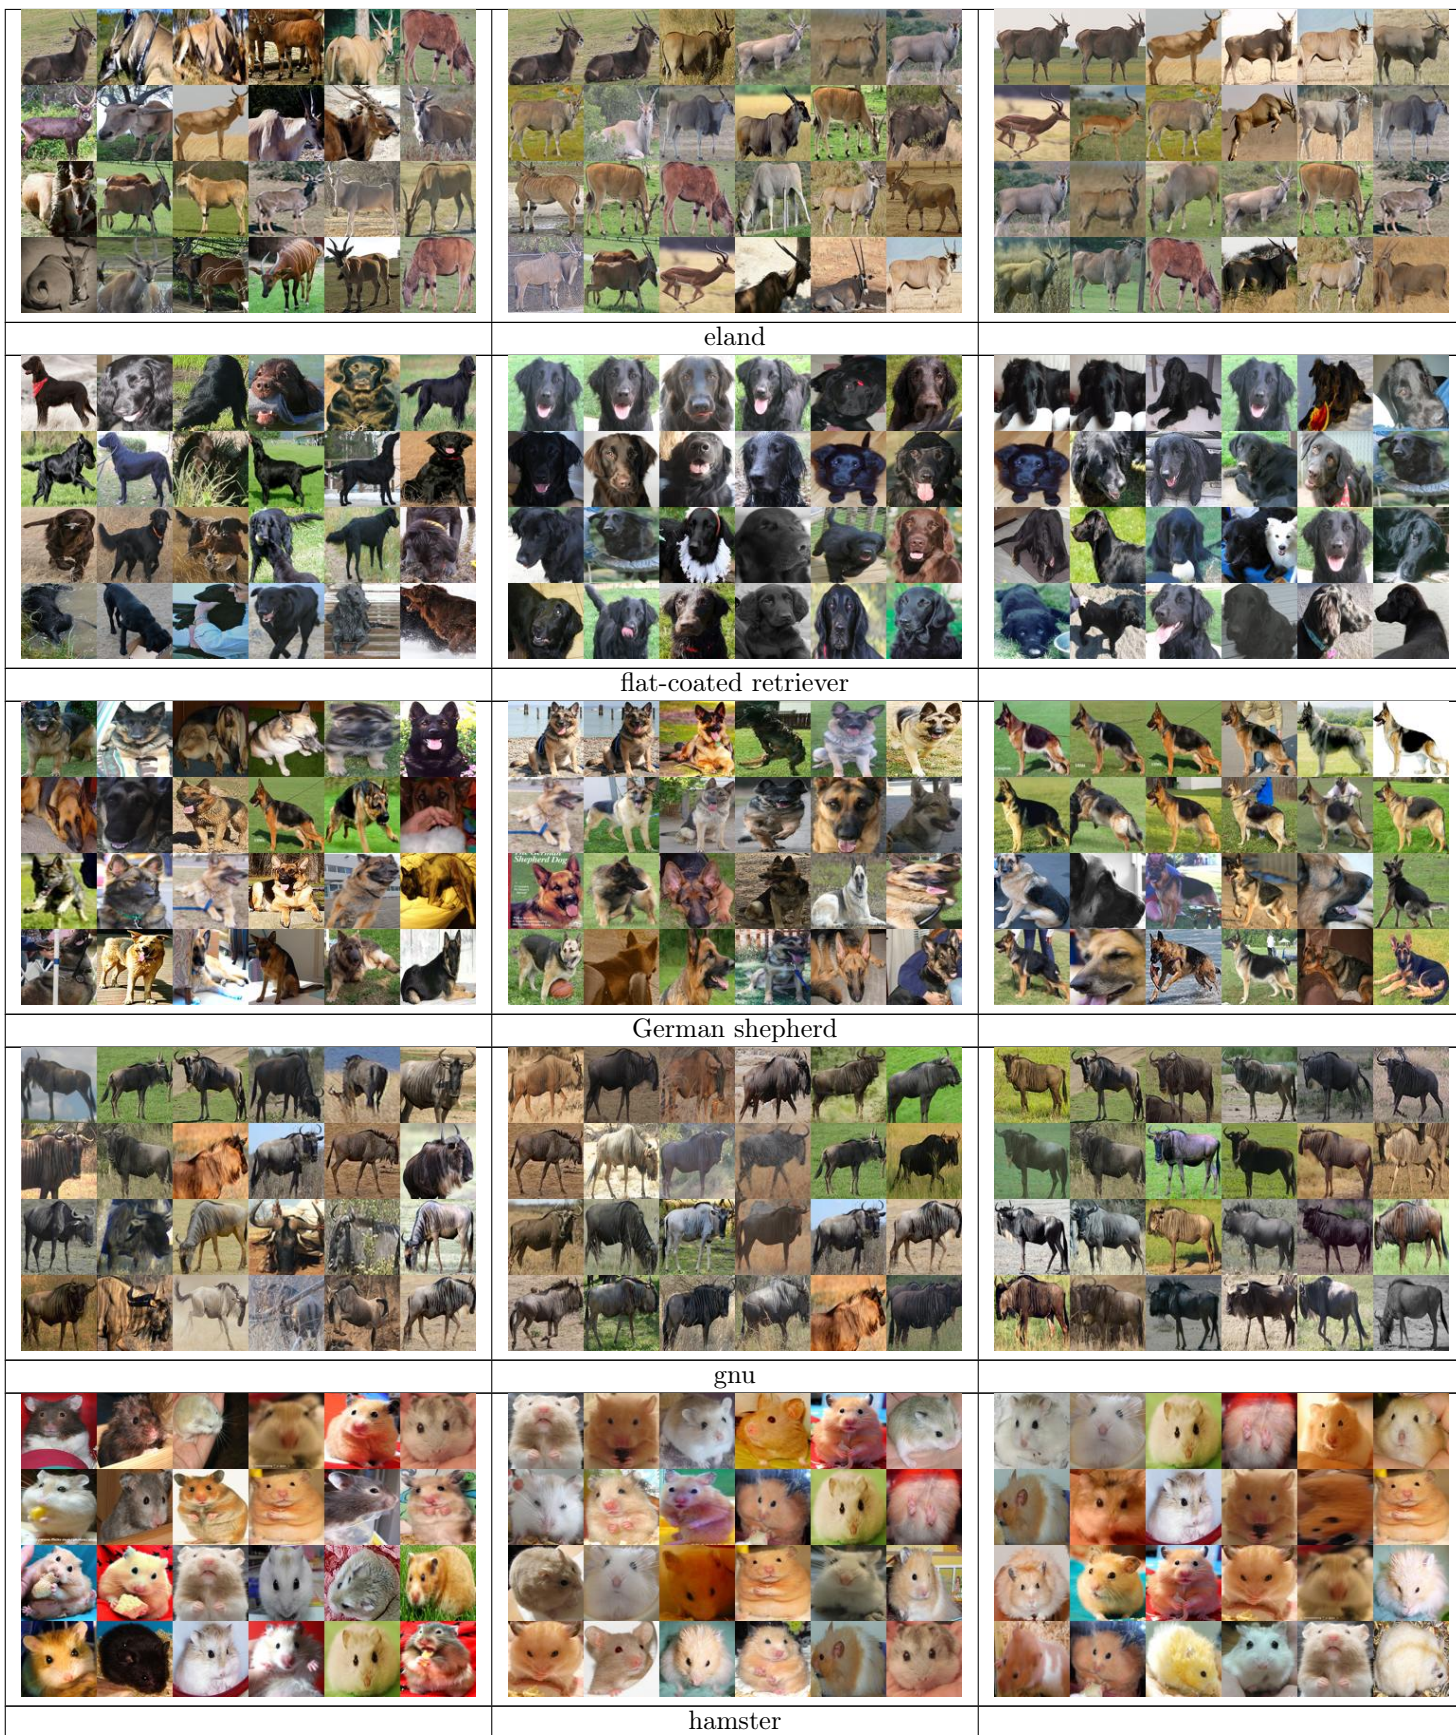



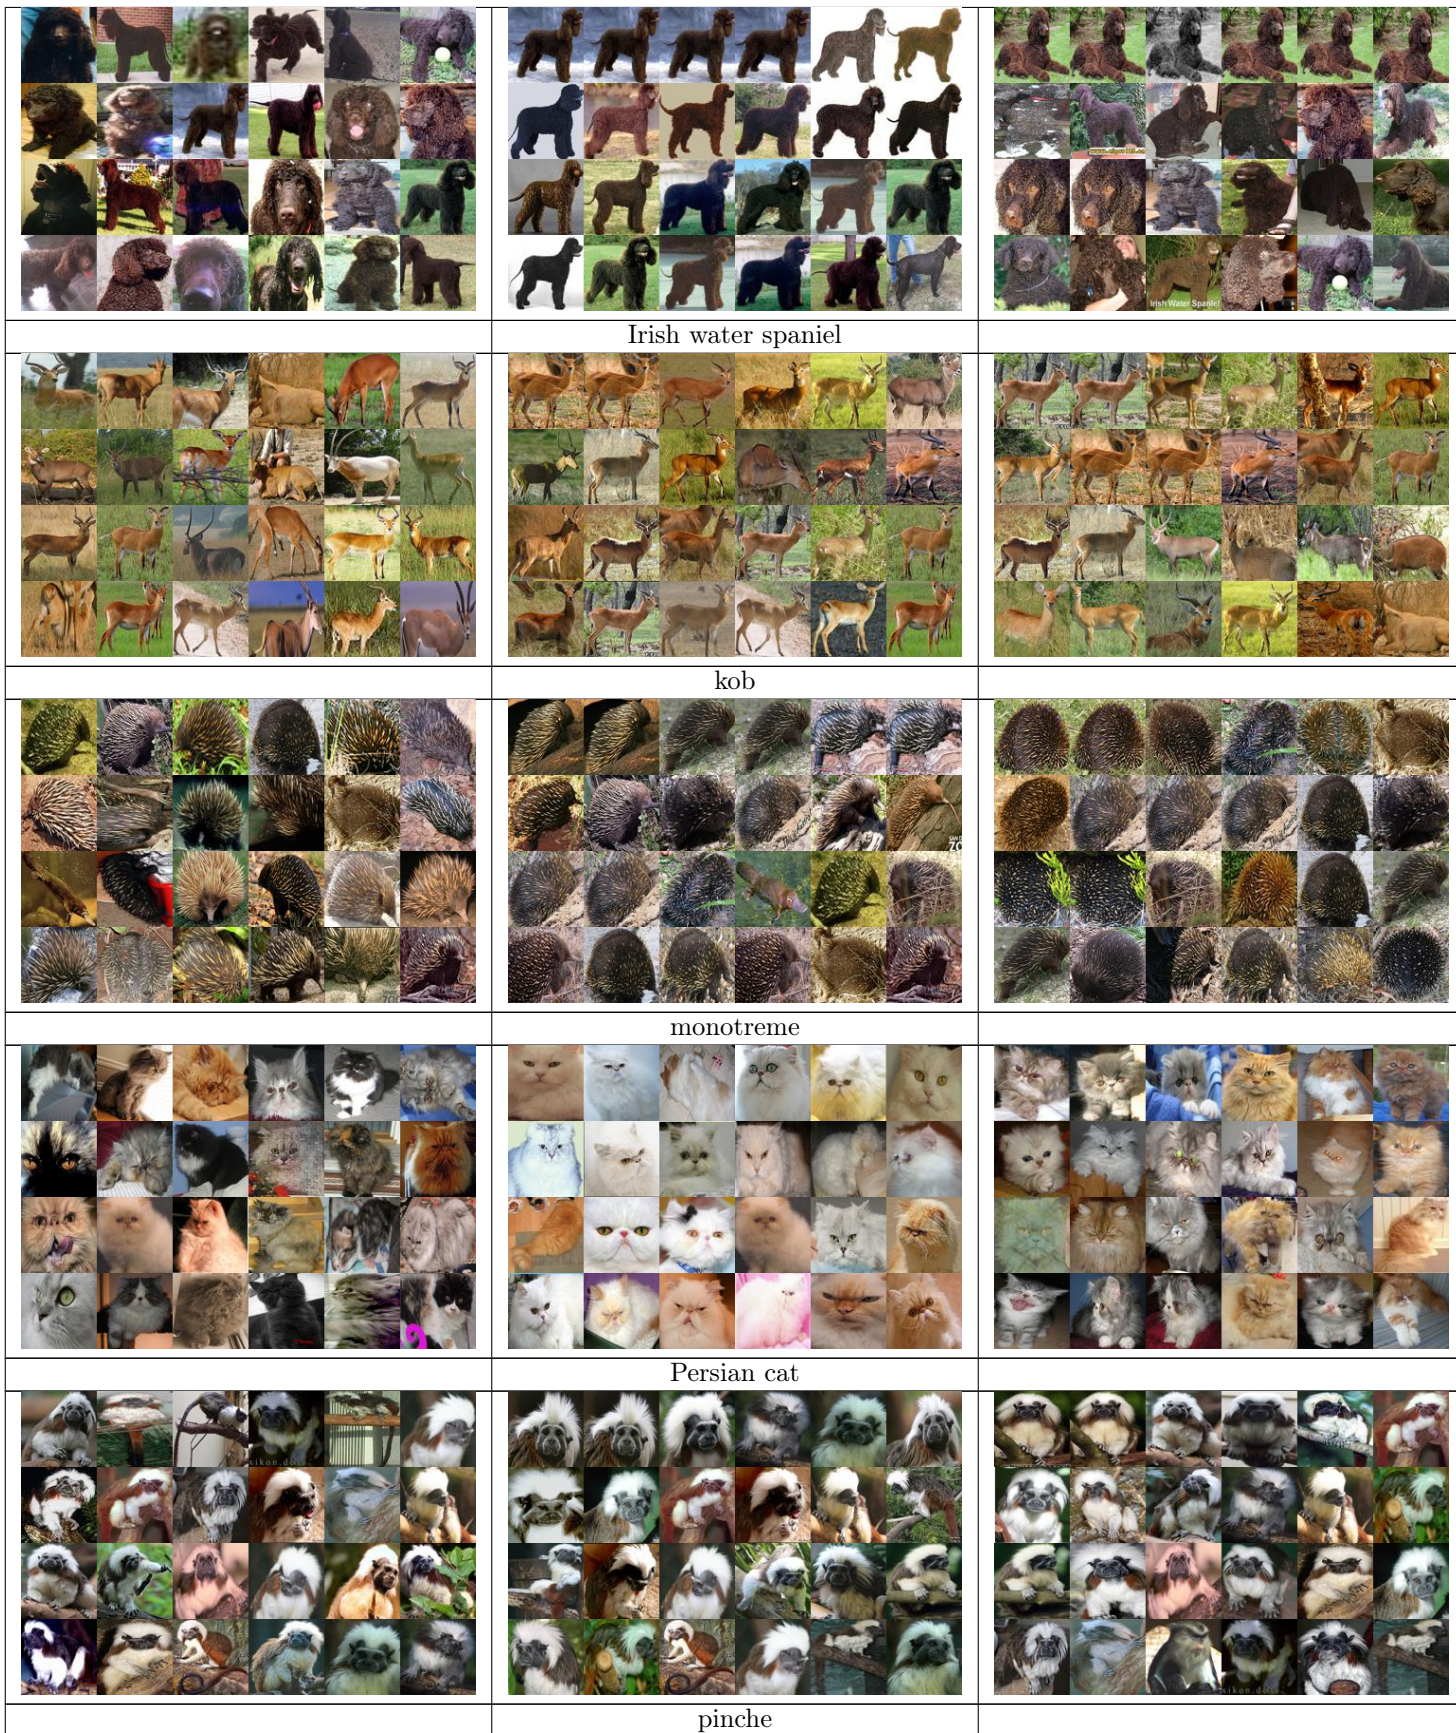



|                                                                                     |                                                                                      |                                                                                       |
|-------------------------------------------------------------------------------------|--------------------------------------------------------------------------------------|---------------------------------------------------------------------------------------|
|    |    |    |
|                                                                                     | pronghorn                                                                            |                                                                                       |
|    |    |    |
|                                                                                     | rodent                                                                               |                                                                                       |
|   |   |   |
|                                                                                     | steeplechaser                                                                        |                                                                                       |
|  |  |  |
|                                                                                     | tiger                                                                                |                                                                                       |
|  |  |  |
|                                                                                     | uakari                                                                               |                                                                                       |



## 5 “Palmer’s categories”, German vs. English vs. Spanish

| google.de                                                                        | google.com                                                                         | google.es                                                                           |
|----------------------------------------------------------------------------------|------------------------------------------------------------------------------------|-------------------------------------------------------------------------------------|
|  |  |  |
| schuh                                                                            | shoe                                                                               | zapatos                                                                             |
|  |  |  |
| teekanne                                                                         | teapot                                                                             | tetera                                                                              |



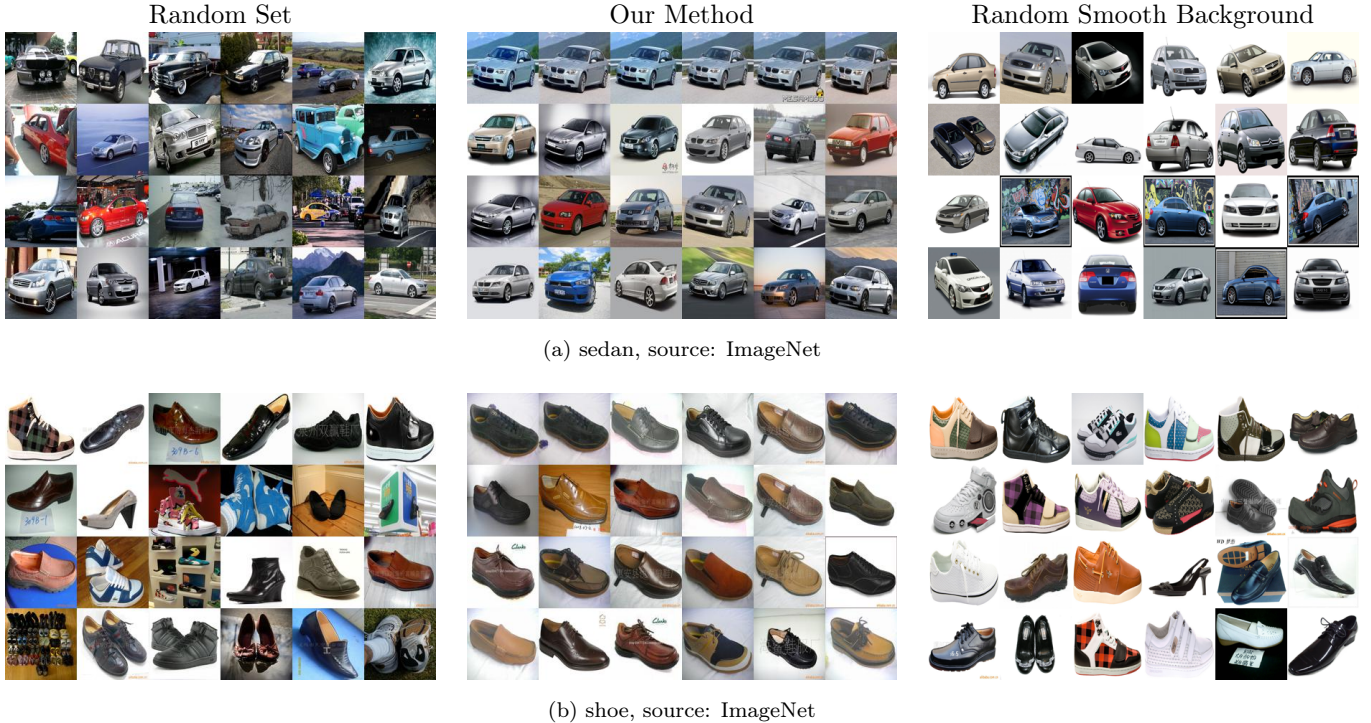

Figure 1: Smooth background effect. Among images with smooth background there is a variation of views - indicating that the view in the image is more important than the smooth background for the method we used.

## 6 Control - Will a method that simply chooses images with uniform background can also find canonical views?

As can be seen in the collages we present for Palmer and Rosch categories, the most frequent view chosen by our method often has a white, or uniform background. Will a method that simply chooses images with uniform background can also find canonical views? Fig. 1 shows this is not the case. Among images with smooth backgrounds there is still a large variation in views.

## 7 Experiments on Synthetic Dataset

We created a synthetic dataset with images of teapots from different viewpoints (see Fig. 2 a and b) using matlab. In addition to images with random view we added a cluster of teapots all with similar azimuth and elevation (up to  $30^\circ$  variance in each, example images can be seen in the first row of Fig. 2b), this view is considered the preferred view and the ground truth for evaluation. The teapots were placed around the center of one out of 7 backgrounds.

**Comparison Between Different Image Descriptors** In the first set of experiments we compared different image descriptors; we wanted to check the distance of which can serve as a proxy for view distance. The descriptions we used are: GIST [4], Bag Of Visual Words [5], simple pixel image descriptor, Local Binary Patterns (LBP) descriptor [6] and HOG2x2 [7]. In each experiment, we approximated the most frequent view using Parzen estimator on one of the five descriptors' spaces. In addition to the most frequent image in the specific descriptor's space we took the 14 images closest to it (L2 distance in the descriptor space). The percent of success is the percent of images out of these 15 images which are from the ground truth view. In the first experiment we varied the ratio of images from the preferred view to the total number of images in the dataset. The results are presented in Fig. 2c. The performance achieved using GIST descriptors is much better than the performance achieved using the other descriptors. It also can be seen that even when the percent of the ground truth images out of the entire set is relatively small (6%) 50% of the images selected are from the ground truth canonical view, and when the set size increases the performances improves.

In the second experiment we wanted to test the effect of the difficulty of the dataset and the effect of the background on the results. We created 7 datasets, consisting of 350 images from a random view and 50 more from the preferred view. Each dataset had a different number of backgrounds from 1-7. The results are shown in Fig. 2d. Again the performances achieved using the GIST descriptor are good and better than when using other descriptors. We can see that indeed the performance decreases when the number of backgrounds increases but stays above 60%.



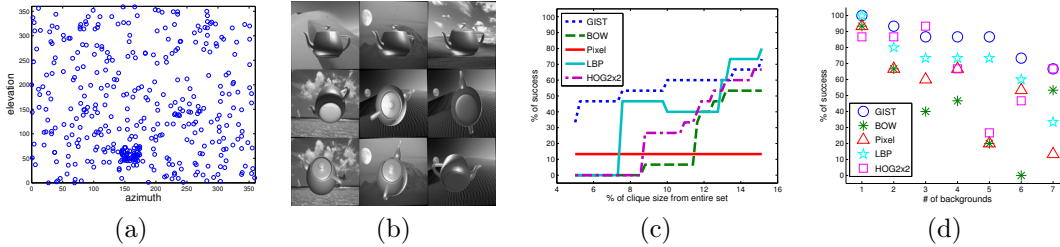

Figure 2: Finding an image descriptor which captures the viewpoint of the image. We created a dataset containing images of teapots from random views plus a clique of teapot images from around the same view - which is considered the ground truth preferred view. (a) Distribution of 400 teapot images by viewpoint, the most likely view is around azimuth  $160^\circ$  and elevation  $60^\circ$ . (b) Example of the images in the synthetic dataset, images from the preferred view are in the first row. (c-d) Comparison of success for 5 image descriptors, GIST (blue), Bag of Words (green), simple pixel descriptor (red), LBP (cyan) and HOG2x2 (magenta). The matching percentage of the most likely image and its 14 closest neighbors to the ground truth is presented for (c) different size of the set of ground truth images (background number fixed to 7) and (d) different number of backgrounds in the dataset (set size fixed to 12.5%).

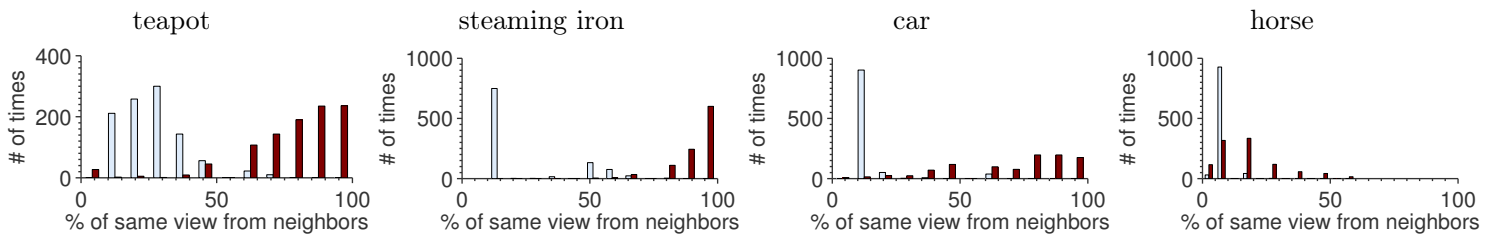

Figure 3: Discriminating between image sets with, or without, a preferred view. Histograms of the percentage of images among the nearest neighbors of the most frequent image, which share the same view with it. The color of the bars indicates whether (red) preferred view existed in the imageset or (grey) was not.

As a final validation, we checked in which percentage of the experiments the most frequent view chosen using the different descriptors was indeed from the ground truth view. We did it for both the first and second experiments under all conditions (58 in total). When using the GIST the most frequent view chosen was in 100% of the cases from the ground truth view. For the other descriptors we got: LBP 83%, HOG2x2 72%, BOW 50% and pixel descriptor 9%.

We concluded that the GIST similarity is the best proxy for view similarity out of the ones we tested. Our next experiments were done using GIST descriptor.

**Can we find the most frequent view directly from images?** The second batch of experiments was done on the synthetic dataset and on four real world categories from Google ("car", "horse" and "steaming iron"), for which we manually found the view of the object in each image (see section 2 in the paper). In each of the datasets we conducted 1,000 experiments where we sampled 200 images according to the original distribution of views in each dataset (for the teapot the size of the preferred view group was 15%). On the teapot, steaming iron and car datasets the most frequent image found using our method was from the ground truth view in 94%, 99% and 95% (respectively) of the experiments. On the horse category the method usually did not find the preferred view (12%).

**Can we know if a preferred view exist?** Next, we validated the second phase of our algorithm. In this phase a human is required to look on the set of images of the modes found using the Parzen density estimator on GIST space and decide if a frequent view was found; he does it by deciding if most of the images are from the same view. We compared the percent of images that are from the same view in the first mode in two kinds of experiments: (1) experiments in which the images were sampled from the original distribution and (2) experiments where the images were sampled uniformly among the views - in this experiment no preferred view existed (for the car and horse categories we used 100 images which were classified as 'noise or unique view'). We used 9 nearest neighbors ( $k$ ). Distributions of the percent of images in the first mode that are from the same view in the 2 sets of experiments, over the 1,000 trials, are presented in Fig. 4. These results indicate that if we run our method and 50% or more of the most frequent image and its nearest neighbors are from the same view, we can say with confidence: There is a preferred view in this image set and we have found it. If we find a smaller percentage we cannot be sure whether it is because no preferred view exist in the image set or the signal is not strong enough (like in the horse category). Thus, when our method is used on several categories it underestimates the number of categories with preferred view.



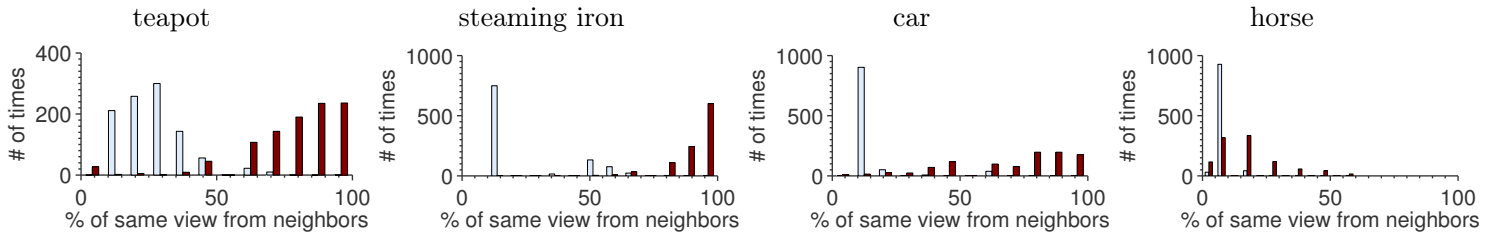

Figure 4: Discriminating between image sets with, or without, a preferred view. Histograms of the percentage of images among the nearest neighbors of the most frequent image, which share the same view with it. The color of the bars indicates whether : (red) preferred view existed in the imageset or (sky) was not.

## References

- [1] S. Palmer, E. Rosch, and P. Chase. Canonical perspective and the perception of objects. *Attention and performance IX*, pages 135–151, 1981. [1](#)
- [2] J. Deng, W. Dong, R. Socher, L.-J. Li, K. Li, and L. Fei-Fei. ImageNet: A Large-Scale Hierarchical Image Database. In *CVPR09*, 2009. [1](#)
- [3] E. Rosch, C.B. Mervis, W.D. Gray, D.M. Johnson, and P. Boyes-Braem. Basic objects in natural categories\* 1. *Cognitive psychology*, 8(3):382–439, 1976. [1](#)
- [4] A. Oliva and A. Torralba. Modeling the shape of the scene: A holistic representation of the spatial envelope. *International Journal of Computer Vision*, 42(3):145–175, 2001. [22](#)
- [5] S. Lazebnik, C. Schmid, and J. Ponce. Beyond bags of features: Spatial pyramid matching for recognizing natural scene categories. In *CVPR 2006*. [22](#)
- [6] T. Ojala, M. Pietikäinen, and T. Mäenpää. Multiresolution gray-scale and rotation invariant texture classification with local binary patterns. *IEEE Transactions on PAMI*, 2002. [22](#)
- [7] J. Xiao, J. Hays, K.A. Ehinger, A. Oliva, and A. Torralba. SUN database: Large-scale scene recognition from abbey to zoo. In *CVPR 2010*. [22](#)
